# Supplementary material for: Diet and Blood Concentrations of Essential and Non-Essential Elements among Rural Residents in Arctic Russia
Source: MDPI journal article supplement (doi:10.3390/nu14235005), 2022-11-24
Supplement: s1 [file s1]

**Supplement Table S1** The arithmetic and geometric means and minimum and maximum concentrations of elements in whole blood (µg/L) according to reported (yes/no) consumption of different traditional food items, being a hunter, catching fish or smoking among the participants.

| <b>Anadromous fish</b>       | <b>Yes<br/>N=238</b> | <b>No<br/>N=58</b> | <b>p</b> |
|------------------------------|----------------------|--------------------|----------|
| <b>As<sup>a</sup></b>        | 5.3 (0.5-163)        | 2.9 (0.5-40.0)     | 0.005    |
| <b>Semi-anadromeous fish</b> | <b>N=154</b>         | <b>N=142</b>       |          |
| <b>Mn</b>                    | 13.1 (5.4-28.5)      | 14.4 (4.3-35.0)    | 0.04     |
| <b>Hg</b>                    | 5.6 (0.5-24.3)       | 4.7 (0.3-23.8)     | 0.07     |
| <b>Pb<sup>a</sup></b>        | 22.1 (5.4-356)       | 26.7 (5.4-281)     | 0.047    |
| <b>Marine fish</b>           | <b>N=198</b>         | <b>N=98</b>        |          |
| <b>Mn</b>                    | 14.2 (5.3-34.5)      | 12.9 (4.3-35.0)    | 0.04     |
| <b>As<sup>a</sup></b>        | 6.8 (0.5-163)        | 2.3 (0.5-62.4)     | <0.001   |
| <b>Freshwater fish</b>       | <b>N=155</b>         | <b>N=141</b>       |          |
| <b>Mn</b>                    | 12.8 (4.3-28.5)      | 14.8 (5.1-35.0)    | 0.001    |
| <b>Cu</b>                    | 1.12 (0.60-1.75)     | 1.08 (0.58-2.40)   | 0.09     |
| <b>Zn</b>                    | 8.6 (4.1-13.7)       | 9.1 (4.9-14.5)     | 0.02     |
| <b>Hg</b>                    | 6.2 (0.5-24.3)       | 4.0 (0.3-21.4)     | <0.001   |
| <b>Pb<sup>a</sup></b>        | 21.5 (6.2-356)       | 27.7 (5.2-281)     | 0.008    |
| <b>As<sup>a</sup></b>        | 3.7 (0.5-163)        | 6.3 (0.5-140)      | <0.001   |
| <b>Reindeer</b>              | <b>N=240</b>         | <b>N=56</b>        |          |
| <b>Mn</b>                    | 13.5 (4.3-35.0)      | 14.8 (5.3-28.6)    | 0.10     |
| <b>Co<sup>a</sup></b>        | 0.54 (0.25-2.49)     | 0.50 (0.30-0.91)   | 0.08     |
| <b>Cu</b>                    | 1.11 (0.58-2.40)     | 1.05 (0.73-1.97)   | 0.10     |
| <b>Other local meat</b>      | <b>N=41</b>          | <b>N=255</b>       |          |
| <b>Hg</b>                    | 6.2 (1.4-18.4)       | 5.0 (0.3-24.3)     | 0.08     |
| <b>Se</b>                    | 131 (93.7-192)       | 124 (84.7-227)     | 0.03     |
| <b>Goose</b>                 | <b>N=242</b>         | <b>N=53</b>        |          |
| <b>Zn</b>                    | 8.7 (4.1-13.7)       | 9.3 (5.7-14.5)     | 0.050    |
| <b>Pb<sup>a</sup></b>        | 25.5 (5.2-356)       | 19.2 (5.4-164)     | 0.02     |
| <b>As<sup>a</sup></b>        | 5.1 (0.5-163)        | 3.4 (0.5-40.1)     | 0.06     |
| <b>Other local birds</b>     | <b>N=141</b>         | <b>N=155</b>       |          |
| <b>Co<sup>a</sup></b>        | 0.51 (0.25-1.73)     | 0.54 (0.29-2.49)   | 0.07     |
| <b>As<sup>a</sup></b>        | 5.8 (0.5-163)        | 3.9 (0.5-140)      | 0.01     |
| <b>Mushroom</b>              | <b>N=86</b>          | <b>N=210</b>       |          |
| <b>As<sup>a</sup></b>        | 6.1 (0.5-143)        | 4.2 (0.5-163)      | 0.03     |
| <b>Se</b>                    | 129 (84.7-227)       | 123 (88.1-192)     | 0.04     |
| <b>Blueberry</b>             | <b>N=143</b>         | <b>N=152</b>       |          |
| <b>Mn</b>                    | 13.0 (4.3-35.0)      | 14.4 (4.5-33.5)    | 0.03     |
| <b>Zn</b>                    | 8.6 (4.1-14.5)       | 9.1 (4.8-13.1)     | 0.01     |
| <b>Hg</b>                    | 5.6 (0.3-24.3)       | 4.7 (0.5-23.8)     | 0.06     |
| <b>Pb<sup>a</sup></b>        | 22.2 (5.6-356)       | 26.4 (5.2-281)     | 0.06     |
| <b>As<sup>a</sup></b>        | 4.0 (0.5-163)        | 5.5 (0.5-140)      | 0.04     |

|                                       |                  |                  |        |
|---------------------------------------|------------------|------------------|--------|
| <b>Cloudberry</b>                     | N=238            | N=57             |        |
| <b>Mn</b>                             | 14.1 (4.3-35.0)  | 12.3 (5.1-24.0)  | 0.006  |
| <b>Cowberry</b>                       | N=205            | N=90             |        |
| <b>Co<sup>a</sup></b>                 | 0.54 (0.26-2.5)  | 0.50 (0.25-0.92) | 0.07   |
| <b>Pb<sup>a</sup></b>                 | 21.7 (5.4-356)   | 31.3 (5.2-281)   | 0.001  |
| <b>Other berries</b>                  | N=82             | N=213            |        |
| <b>As<sup>a</sup></b>                 | 5.9 (0.5-16.3)   | 4.3 (0.5-140)    | 0.08   |
| <b>Being a hunter (Missing data!)</b> | N=55             | N=202            |        |
| <b>Co<sup>a</sup></b>                 | 0.49 (0.25-1.7)  | 0.54 (0.27-2.5)  | 0.02   |
| <b>Cu</b>                             | 1.04 (0.58-1.43) | 1.11 (0.69-1.97) | 0.04   |
| <b>Pb<sup>a</sup></b>                 | 39.8 (8.0-356)   | 20.8 (5.2-218)   | <0.001 |
| <b>Catching fish</b>                  | N=130            | N=148            |        |
| <b>Co<sup>a</sup></b>                 | 0.50 (0.25-1.2)  | 0.56 (0.28-2.5)  | 0.001  |
| <b>Cu</b>                             | 1.07 (0.58-2.40) | 1.13 (0.69-1.97) | 0.04   |
| <b>Pb<sup>a</sup></b>                 | 28.8 (5.4-281)   | 21.0 (5.6-356)   | 0.001  |
| <b>Smoking</b>                        | N=97             | N=189            |        |
| <b>Cd<sup>a</sup></b>                 | 0.76 (0.13-4.2)  | 0.22 (<DL-3.0)   | <0.001 |
| <b>Pb<sup>a</sup></b>                 | 31.3 (6.8-218)   | 21.4 (5.2-356)   | <0.001 |

<sup>a</sup>geometric mean
